# Supplementary material for: A journey through space and time: impact of forest planning approaches on spatio-temporal habitat connectivity
Source: Research Square preprint supplement (doi:10.21203/rs.3.rs-7063475/v1), 2025-07-14
Supplement: Supplementary file 1 [file 8efc595597e74b5eaaf00d15.docx]

**Supplementary information**

**Journal:** Landscape Ecology

**Title:** A journey through space and time: impact of forest planning approaches on spatio-temporal habitat connectivity.

**Authors:** Juliette Hunault-Fontbonne1, *, Rémi Duflot2,3, Kyle Eyvindson1, 4

1 Norwegian University of Life Sciences (NMBU), Faculty of Environmental Sciences and Natural Resource Management, Høgskoleveien 12, 1433 Ås, Norway

2 Department of Biological and Environmental Science, University of Jyväskylä, P.O. Box 35, 40014 Jyväskylä, Finland

3 School of Resource Wisdom, University of Jyväskylä, P.O. Box 35, 40014 Jyväskylä, Finland

4 Natural Resource Institute Finland (LUKE), Laatokartanonkaari 9, 00790 Helsinki, Finland

*Corresponding author, PhD candidate, [juliette.hunault@nmbu.no](mailto:juliette.hunault@nmbu.no)

**Supplementary Figure**
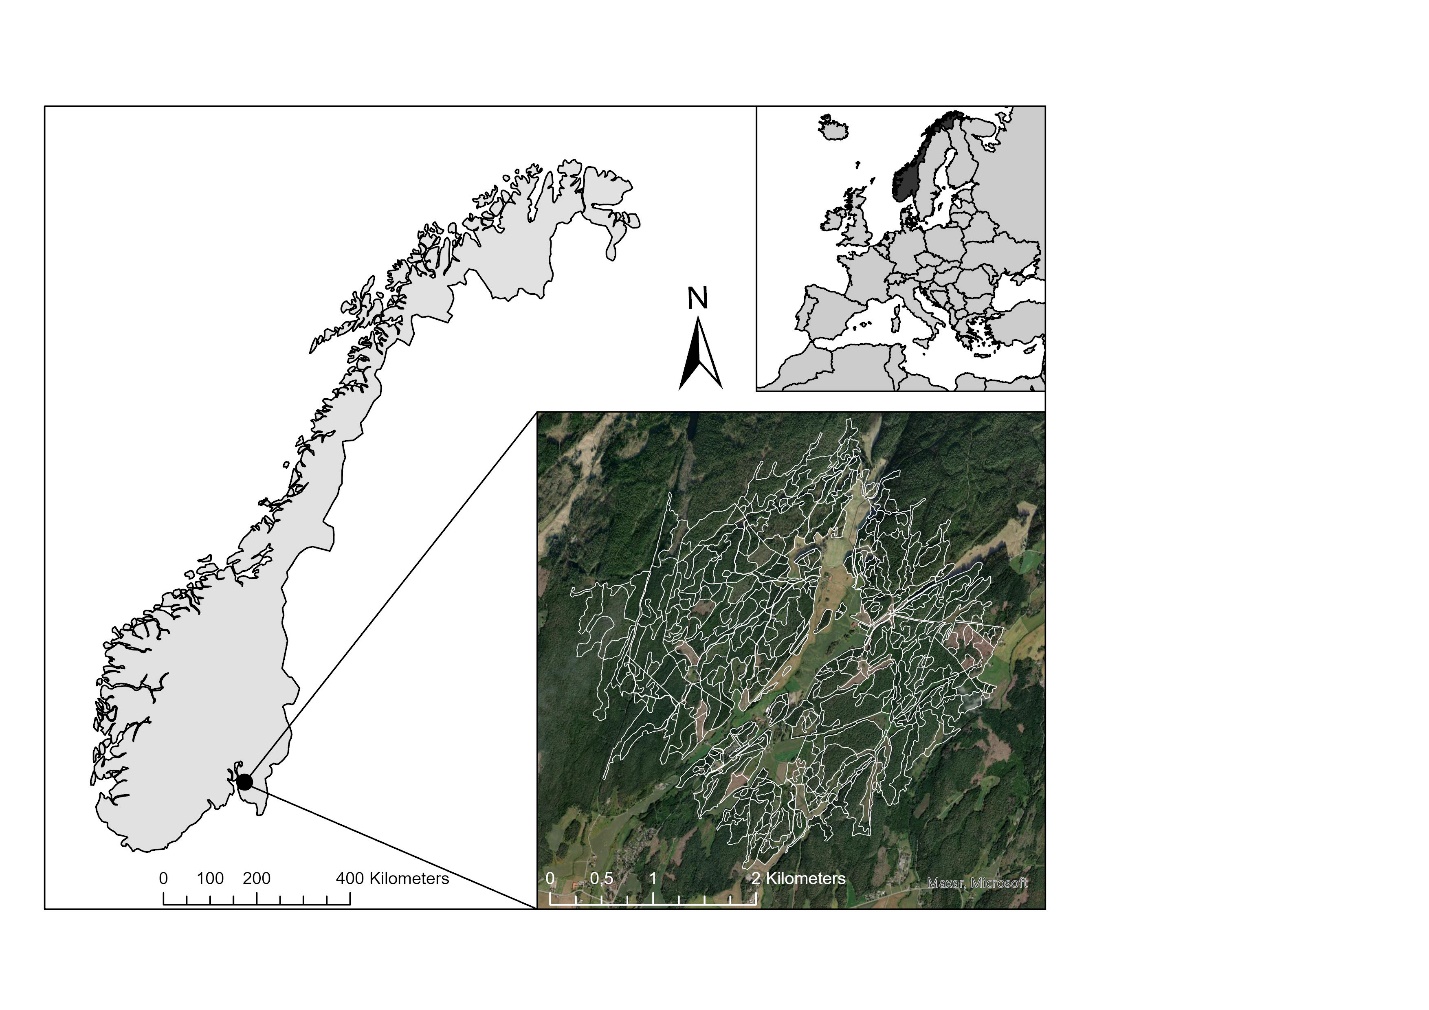


**Figure S1.** Map of the study area located in in Våler municipality, Østfold county, southeastern Norway

**Supplementary Tables**

**Table S1.** Average stand age and tree diameter for each scenario at the beginning, the middle and the end of the planning horizon. The highest numbers for each metrics are in bold.

| **Metrics** | **Scenarios** | **Period 2** | **Period 6** | **Period 10** |
| --- | --- | --- | --- | --- |
| **Stand age (years)** | S1 SEG | 57 | 49 | 58 |
| S2 SEG-spatial | 44 | 31 | 42 |
| S3 TRIAD | **61** | **73** | **60** |
| S4 TRIAD-spatial | 54 | 55 | 39 |
| **Tree diameter (cm)** | S1 SEG | 27 | 22 | 25 |
| S2 SEG-spatial | 19 | 12 | 15 |
| S3 TRIAD | **30** | **30** | **25** |
| S4 TRIAD-spatial | 25 | 19 | 13 |

**Tab S2.** Proportion of the overall spatio-temporal landscape connectivity achieved by PCstep, PCdirect, and PCintra for each species and scenario.

| **Scenarios** | **LTT** | | | **HAZ** | | | **TTWP** | | |
| --- | --- | --- | --- | --- | --- | --- | --- | --- | --- |
|  | **Step** | **Direct** | **Intra** | **Step** | **Direct** | **Intra** | **Step** | **Direct** | **Intra** |
| **S1 SEG** | 11 | 45 | 44 | 21 | 67 | 12 | 3 | 95 | 2 |
| **S2 SEG-spatial** | 10 | 46 | 44 | 21 | 62 | 17 | 1 | 93 | 5 |
| **S3 TRIAD** | 12 | 46 | 41 | 21 | 67 | 12 | 3 | 95 | 2 |
| **S4 TRIAD-spatial** | 16 | 47 | 37 | 18 | 70 | 12 | 3 | 94 | 4 |

**Supplementary information: probability rules**

The factors applied to spatial probabilities to include the temporal element depend on the type of link between two nodes with two main types: essential and auxiliary links. Essential links are going from a node with habitat at to a node with habitat at and do not require steppingstones (Table S3).

**Table S3.** Temporal essential links adapted from Martensen et al. (2017)

|  |  | **Destination node at tn+1** | | |
| --- | --- | --- | --- | --- |
|  |  | **STABLE** | **LOSS** | **GAIN** |
| **Source node at tn** | **STABLE** | 1 | 0 | 1 |
| **LOSS** | 1 | 0 | 0.5 |
| **GAIN** | 0 | 0 | 0 |

Auxiliary links require the use of one or several temporal steppingstones (Table S4), they are divided in two types:

- Links going to a loss node at time from any other node type. This type of links requires at least one other link to reach a patch with habitat in .
- Links going from gain at time to any other node type. This type of link requires at least one other link from a patch with habitat at .

**Table S4.** Temporal auxiliary links adapted from Martensen et al. (2017)

|  |  | **Destination node at ty** | | |
| --- | --- | --- | --- | --- |
|  |  | **STABLE** | **LOSS** | **GAIN** |
| **Source node at tx** | **STABLE** | n/a | 1 | n/a |
| **LOSS** | n/a | 1 | n/a |
| **GAIN** | 1 | 0.5 | 1 |

For movements from LOSS to GAIN and from GAIN to LOSS the probability is multiplicated by a factor of 0.5 due to the assumption that transitioning nodes can potentially coexist as habitats at tx or ty.

**Reference:**

Martensen, A. C., Saura, S., & Fortin, M. J. (2017). Spatio-temporal connectivity: assessing the amount of reachable habitat in dynamic landscapes. *Methods in Ecology and Evolution*, *8*(10), 1253–1264. https://doi.org/10.1111/2041-210X.12799

**Supplementary information: Equations for scenarios formulations**

**Scenario S1 SEG**

**Step 1a**

| *Objective function:* | |
| --- | --- |
| [1] |  |
| *Subject to:* |  |
| [2] |  |
| [3] | *For each stand, at most 1 regime is selected.* |
| [4] | *The area of stands managed for the ecological objective is greater than 29.5% of total area.* |
| [5] | *The area of stands managed for the ecological objective is lesser than 30.5% of total area.* |

**Step 1b**

| *Objective function:* | |
| --- | --- |
| [6] |  |
| *Subject to:* |  |
| [7] | *For each stand, 1 regime is selected.* |
| [8] | *Stands and regimes selected in step 1a are unchanged.* |
| And to equation [2] | |

**Scenario S2 SEG-spatial**

**Step 2a**

| *Objective function:* | |
| --- | --- |
| [9] |  |
| *Subject to:* |  |
| [10] |  |
| [11] |  |
| [12] | *Only 1 cluster is selected.* |
| [13] | *All stands in selected cluster c are selected.* |
| [14] | *Auxiliary variable zc is lesser than or equal to the ecological value of the cluster c.* |
| [15] | *When cluster c is selected, the auxiliary variable should be greater than or equal to the ecological value of cluster c. Combined with equation* [14], *this constraint ensures that the auxiliary variable zc is equal to the ecological value of cluster c.* |
| [16] | *Auxiliary variable zc is lesser than or equal to the maximum value of the ecological objective.* |
| And to equations [2], [3] | |

**Step 2b**

| *Objective function:* | |
| --- | --- |
| Same as [6] |  |
| *Subject to:* |  |
| [17] | *Stands and regimes selected in step 2a are unchanged.* |
| And to equations [2], [7] | |

**Scenario S3 TRIAD**

**Step 3a**

| *Objective function:* | |
| --- | --- |
| [18] |  |
| *Subject to:* |  |
| [19] |  |
| [20] |  |
| [21] |  |
| [22] | *The area of stands set aside is equal to % of total area (with small deviation allowed), in this case .* |
| And to equations [2], [3] | |

**Step 3b**

| *Objective function:* | |
| --- | --- |
| [23] |  |
| *Subject to:* |  |
| [24] |  |
| [25] |  |
| [26] |  |
| [27] | *The area of stands set aside is equal to % of total area (with small deviation allowed), in this case .* |
| [28] | *No stand is selected for intensive management in this step.* |
| [29] | *Stands and regimes selected in step 3a are unchanged.* |
| And to equations [2], [7], [19], [20], [21], [22] | |

**Step 3c**

| *Objective function:* | |
| --- | --- |
| [30] |  |
| *Subject to:* |  |
| [31] | *Stands and regimes selected in step 3b are unchanged.* |
| And to equations [2], [7] | |

**Scenario S4 TRIAD-spatial**

**Step 4a**

| *Objective function:* | |
| --- | --- |
| [32] |  |
| *Subject to:* |  |
| [33] | *Auxiliary variable zc is lesser than or equal to the ecological value of the cluster c.* |
| [34] | *When cluster c is selected, the auxiliary variable should be greater than or equal to the ecological value of cluster c. Combined with equation* [14], *this constraint ensures that the auxiliary variable zc is equal to the ecological value of cluster c.* |
| And to equations [2], [3], [10], [11], [12], [13], [16], [19], [20], [21], [22] | |

**Step 4b**

| *Objective function:* | |
| --- | --- |
| [35] |  |
| *Subject to:* |  |
| [36] | *The area of stands from the extensively managed cluster is equal to 20% of total area (with small deviation allowed).* |
| [37] | *Auxiliary variable zc is lesser than or equal to the combined ecological and economic value of cluster c.* |
| [38] | *When cluster c is selected, the auxiliary variable should be greater than or equal to the combined ecological and economic value of cluster c. Combined with equation [37], this constraint ensures that the auxiliary variable zc is equal to the combined ecological and economic value of cluster c.* |
| [39] | *Auxiliary variable zc is lesser than or equal to the maximum value of the combined objectives.* |
| [40] | *Stands and regimes selected in step 4a are unchanged.* |
| And to equations [2], [3], [10], [11], [12], [13], [24], [25], [26] | |

**Step 4c**

| *Objective function:* | |
| --- | --- |
| Same as [30] |  |
| *Subject to:* |  |
| [41] |  |
| [42] |  |
| And to equations [2], [7] | |

**Table S5.** Description of notation used in model formulation of the four optimization scenarios

| **Symbol** | **Description** |
| --- | --- |
| **Sets** |  |
| S | The set of stands |
|  | The set of management regimes for stand s |
| C | The set of clusters |
|  | The set of stands in cluster c |
| M | The set of intensity categories (SA, INT, EXT) |
|  | Set of management regimes for stand s that belong to either intensity category |
| **Variables** |  |
|  | Economic value from conducting management regime r on stand s |
|  | Ecological value from conducting management regime r on stand s |
|  | Area of stand s |
|  | Positive and negative deviation from either intensity category |
|  | The binary decision variable for stand s and management regime r (=1 if regime r is selected for stand s) |
|  | The binary decision variable for cluster c (=1 if cluster c is selected) |
|  | Continuous auxiliary variable for cluster c |
|  | Number of stands in cluster c |
| **Parameters** |  |
|  | Proportion of the landscape managed according to either intensity category |
|  | Represents the maximum value of the objective for either |
|  | A very large value |
|  | A very small value |
